# Supplementary material for: Survival Differences by Comorbidity Burden among Patients with Stage I/II Non-Small-Cell Lung Cancer after Thoracoscopic Resection
Source: MDPI journal article supplement (doi:10.3390/cancers15072075), 2023-03-30

**Supplementary Table S1.** Sensitivity analysis for participants not receiving chemotherapy (N=52,083)

|            | No.<br>deaths/person-<br>years | Mortality Rate (per<br>1,000 person-years)<br>(95% CI) | Age-adjusted<br>HR (95% CI) | aHR (95% CI) †   | aHR (95% CI) §   |
|------------|--------------------------------|--------------------------------------------------------|-----------------------------|------------------|------------------|
| <b>CCI</b> |                                |                                                        |                             |                  |                  |
| <b>0</b>   | 6,335/99,920.61                | 63.4 (61.9-64.9)                                       | 1 [Reference]               | 1 [Reference]    | 1 [Reference]    |
| <b>1</b>   | 5,404/61,968.89                | 87.2 (85.0-89.5)                                       | 1.37 (1.32-1.42)            | 1.29 (1.25-1.34) | 1.26 (1.22-1.31) |
| <b>2+</b>  | 3,430/29,905.93                | 114.7 (111.1-118.4)                                    | 1.78 (1.71-1.86)            | 1.62 (1.55-1.69) | 1.56 (1.49-1.62) |
|            |                                |                                                        | p-trend < 0.01              | p-trend < 0.01   | p-trend < 0.01   |

Abbreviations: **aHR**: Adjusted hazard ratio; **CCI**: Charlson comorbidity index; **CI**: Confidence interval

† Adjusted for age, sex, race/ethnicity, education, income, insurance, and facility type (academic versus nonacademic)

§ Adjusted for all covariates included in first model, as well as stage at diagnosis, days from diagnosis to surgery and histological type

**Supplementary Table S2.** Sensitivity analysis incorporating different sets of covariates and indicator of exclusion due to missing data

|                                             | <b>Model 1 (N=66,508)</b><br><b>aHR (95% CI)</b>                              | <b>Model 2 (N=75,701)</b><br><b>aHR (95% CI)</b>                                     | <b>Model 3 (N=63,061)</b><br><b>aHR (95% CI)</b>                                                                                                             |
|---------------------------------------------|-------------------------------------------------------------------------------|--------------------------------------------------------------------------------------|--------------------------------------------------------------------------------------------------------------------------------------------------------------|
| <b>CCI</b>                                  |                                                                               |                                                                                      |                                                                                                                                                              |
| 0                                           | 1 [Reference]                                                                 | 1 [Reference]                                                                        | 1 [Reference]                                                                                                                                                |
| 1                                           | 1.26 (1.22-1.30)                                                              | 1.26 (1.22-1.30)                                                                     | 1.23 (1.19-1.27)                                                                                                                                             |
| 2+                                          | 1.56 (1.51-1.62)                                                              | 1.57 (1.52-1.63)                                                                     | 1.55 (1.45-1.56)                                                                                                                                             |
|                                             | p-trend < 0.01                                                                | p-trend < 0.01                                                                       | p-trend < 0.01                                                                                                                                               |
| <b>Adjusted variables</b>                   | Age, sex, race/ethnicity,<br>income, education, and<br>indicator of exclusion | Age, sex, race/ethnicity,<br>insurance, facility type,<br>and indicator of exclusion | Age, sex, race/ethnicity,<br>histological type, tumor<br>stage, receipt of<br>chemotherapy, days from<br>diagnosis to surgery, and<br>indicator of exclusion |
| <b>No. of additional cases in<br/>model</b> | 4,748                                                                         | 13,941                                                                               | 1,301                                                                                                                                                        |
| <b>Ratio to study<br/>population‡</b>       | 1.08                                                                          | 1.23                                                                                 | 1.02                                                                                                                                                         |

‡The ratio is calculated as (No. patients included for sensitivity analysis/No. study population in main model [N=61,760])

**Supplementary Table S3.** Sensitivity analysis for 90-day mortality by CCI

| CCI           | No. deaths within 90 days<br>after surgery | Proportion (%) of deaths and<br>95% CI |
|---------------|--------------------------------------------|----------------------------------------|
| 0 (N=31,623)  | 573                                        | 1.8 (1.7-2.0)                          |
| 1 (N=19,640)  | 469                                        | 2.4 (2.2-2.6)                          |
| 2+ (N=10,497) | 337                                        | 3.2 (2.9-3.6)                          |

**Supplementary Table S4.** Sensitivity analysis for participants who received sublobar resection (N=18,007)

| CCI | aHR (95% CI)                  |                                  |                   | p-interaction |
|-----|-------------------------------|----------------------------------|-------------------|---------------|
|     | Wedge resection<br>(N=13,951) | Segmental resection<br>(N=3,611) | Other*<br>(N=445) |               |
| 0   | 1 [Reference]                 | 1 [Reference]                    | 1 [Reference]     | < 0.01        |
| 1   | 1.21 (1.13-1.29)              | 1.46 (1.27-1.68)                 | 1.47 (1.05-2.05)  |               |
| 2+  | 1.51 (1.41-1.63)              | 1.56 (1.33-1.84)                 | 1.15 (0.79-1.69)  |               |

\*Includes unspecified excision, laser excision, and bronchial sleeve resection (aggregated due to low counts)

Model adjusted for age, sex, race/ethnicity, education, income, insurance, facility type (academic versus nonacademic), stage at diagnosis, histological type, days from diagnosis to surgery, and receipt of adjuvant chemotherapy

**Supplementary Figure S1.** Kaplan-Meier survival curve by CCI, including patients with missing values for relevant covariates.

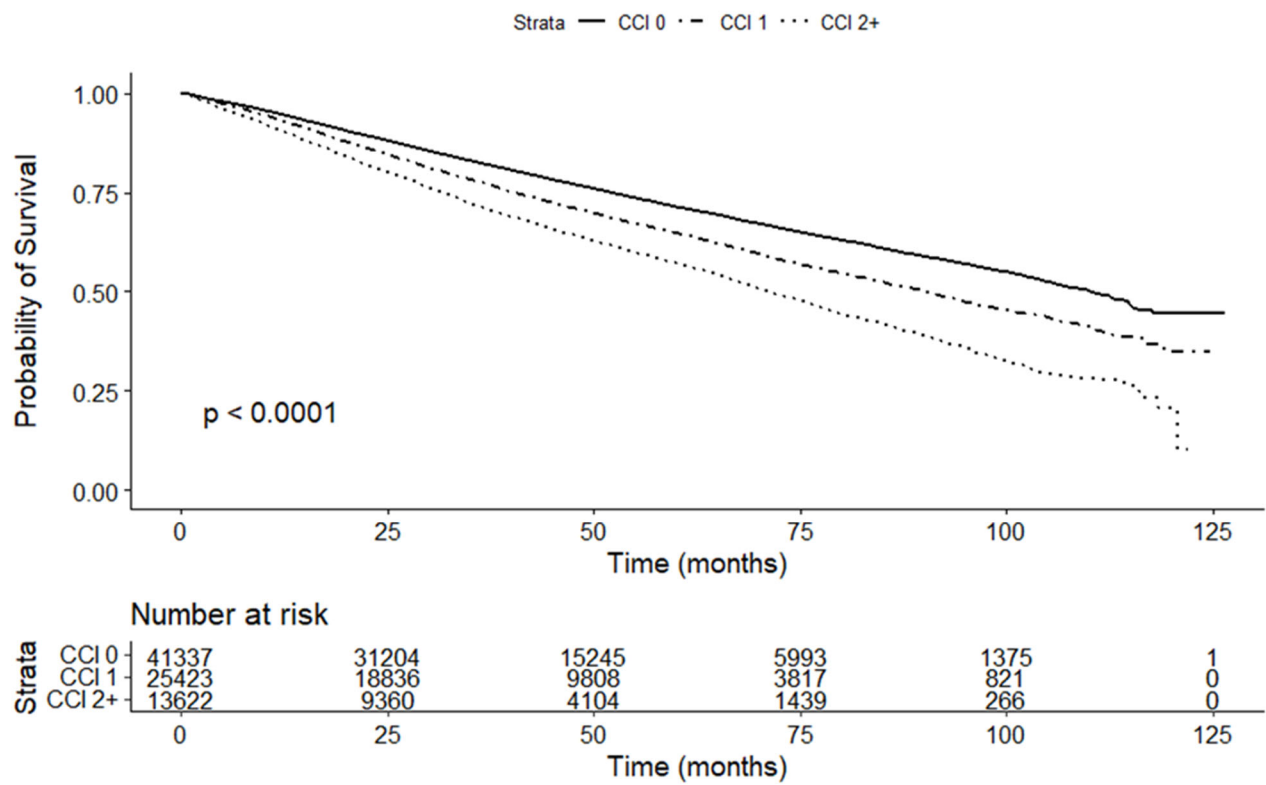

Supplement: s1 [file s1]
